# Supplementary material for: Halogen bonds with carbenes acting as Lewis base units: complexes of imidazol-2-ylidene: theoretical analysis and experimental evidence
Source: Royal Society of Chemistry journal article supplement (doi:10.1039/d3cp00348e), 2023-01-01
Supplement: d3cp00348e1.pdf [file d3cp00348e1.pdf]

## Supplementary Information

### Halogen bonds with carbenes acting as Lewis base units: complexes of imidazol-2-ylidene: theoretical analysis and experimental evidences

Sławomir J. Grabowski <sup>a,b</sup>

---

a Faculty of Chemistry University of the Basque Country  
and Donostia International Physics Center (DIPC)  
P.K. 1072, 20080 Donostia, Spain  
E-mail: [s.grabowski@ikerbasque.org](mailto:s.grabowski@ikerbasque.org)

b IKERBASQUE  
Basque Foundation for Science  
48011 Bilbao, Spain

---

#### Complexes of imidazol-2-ylidene (C<sub>3</sub>N<sub>2</sub>H<sub>4</sub>)

ωB97XD/aug-cc-pVTZ results (ωB97XD/aug-cc-pVTZ-PP for iodine)

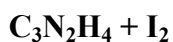

| Center | Atomic | Atomic | Coordinates (Angstroms) |           |           |
|--------|--------|--------|-------------------------|-----------|-----------|
| Number | Number | Type   | X                       | Y         | Z         |
| 1      | 53     | 0      | 0.180024                | -0.000384 | -0.000032 |
| 2      | 7      | 0      | 3.329133                | -1.055852 | 0.000032  |
| 3      | 7      | 0      | 3.328152                | 1.055997  | 0.000038  |
| 4      | 6      | 0      | 2.504872                | -0.000314 | 0.000018  |
| 5      | 6      | 0      | 4.655275                | 0.674148  | 0.000004  |
| 6      | 6      | 0      | 4.655908                | -0.672757 | 0.000015  |
| 7      | 1      | 0      | 2.990249                | 2.002173  | 0.000057  |
| 8      | 1      | 0      | 2.992146                | -2.002349 | 0.000044  |
| 9      | 1      | 0      | 5.466093                | 1.377917  | -0.000010 |
| 10     | 1      | 0      | 5.467376                | -1.375776 | 0.000011  |
| 11     | 53     | 0      | -2.716122               | 0.000206  | 0.000017  |

**C<sub>3</sub>N<sub>2</sub>H<sub>4</sub> + Br<sub>2</sub>**

| Center<br>Number | Atomic<br>Number | Atomic<br>Type | Coordinates (Angstroms) |           |           |
|------------------|------------------|----------------|-------------------------|-----------|-----------|
|                  |                  |                | X                       | Y         | Z         |
| 1                | 35               | 0              | -0.200697               | -0.000001 | 0.000004  |
| 2                | 7                | 0              | 2.583294                | 1.061309  | -0.000119 |
| 3                | 7                | 0              | 2.583269                | -1.061299 | 0.000071  |
| 4                | 6                | 0              | 1.772942                | 0.000014  | 0.000014  |
| 5                | 6                | 0              | 3.909037                | -0.673470 | -0.000147 |
| 6                | 6                | 0              | 3.909052                | 0.673449  | 0.000176  |
| 7                | 1                | 0              | 2.238294                | -2.005769 | 0.000114  |
| 8                | 1                | 0              | 2.238345                | 2.005788  | -0.000216 |
| 9                | 1                | 0              | 4.720029                | -1.376820 | -0.000256 |
| 10               | 1                | 0              | 4.720060                | 1.376779  | 0.000303  |
| 11               | 35               | 0              | -2.874414               | 0.000001  | -0.000001 |

**C<sub>3</sub>N<sub>2</sub>H<sub>4</sub> + Cl<sub>2</sub>**

| Center<br>Number | Atomic<br>Number | Atomic<br>Type | Coordinates (Angstroms) |           |           |
|------------------|------------------|----------------|-------------------------|-----------|-----------|
|                  |                  |                | X                       | Y         | Z         |
| 1                | 17               | 0              | -0.879415               | -0.000360 | -0.000050 |
| 2                | 7                | 0              | 1.644065                | -1.066382 | 0.000097  |
| 3                | 7                | 0              | 1.643727                | 1.066428  | -0.000023 |
| 4                | 6                | 0              | 0.841685                | -0.000104 | -0.000048 |
| 5                | 6                | 0              | 2.968611                | 0.673449  | 0.000089  |
| 6                | 6                | 0              | 2.968817                | -0.673000 | -0.000091 |
| 7                | 1                | 0              | 1.293589                | 2.009627  | 0.000046  |
| 8                | 1                | 0              | 1.294222                | -2.009691 | 0.000180  |
| 9                | 1                | 0              | 3.779542                | 1.376676  | 0.000147  |
| 10               | 1                | 0              | 3.779963                | -1.375981 | -0.000171 |

11 17 0 -3.463911 0.000182 0.000026

### **C<sub>3</sub>N<sub>2</sub>H<sub>4</sub> + F<sub>2</sub>**

| Center<br>Number | Atomic<br>Number | Atomic<br>Type | Coordinates (Angstroms) |           |           |
|------------------|------------------|----------------|-------------------------|-----------|-----------|
|                  |                  |                | X                       | Y         | Z         |
| 1                | 9                | 0              | -1.558707               | -0.000089 | -0.955853 |
| 2                | 7                | 0              | 0.301018                | -1.114706 | -0.161567 |
| 3                | 7                | 0              | 0.300977                | 1.114612  | -0.161710 |
| 4                | 6                | 0              | -0.554060               | -0.000009 | -0.042133 |
| 5                | 6                | 0              | 1.624236                | 0.664955  | 0.006729  |
| 6                | 6                | 0              | 1.624350                | -0.664881 | 0.006405  |
| 7                | 1                | 0              | -0.009657               | 1.963709  | 0.277243  |
| 8                | 1                | 0              | -0.009369               | -1.963317 | 0.278563  |
| 9                | 1                | 0              | 2.449162                | 1.352800  | 0.012944  |
| 10               | 1                | 0              | 2.449370                | -1.352619 | 0.012315  |
| 11               | 9                | 0              | -1.248028               | 0.000055  | 1.162061  |

### **C<sub>3</sub>N<sub>2</sub>H<sub>4</sub> + HCCI**

| Center<br>Number | Atomic<br>Number | Atomic<br>Type | Coordinates (Angstroms) |           |           |
|------------------|------------------|----------------|-------------------------|-----------|-----------|
|                  |                  |                | X                       | Y         | Z         |
| 1                | 6                | 0              | -3.141195               | -0.000101 | -0.000153 |
| 2                | 6                | 0              | -4.342502               | -0.000389 | -0.000369 |
| 3                | 1                | 0              | -5.404905               | -0.001089 | -0.000520 |
| 4                | 53               | 0              | -1.096879               | 0.000141  | 0.000127  |
| 5                | 7                | 0              | 2.609568                | -1.048086 | -0.000020 |
| 6                | 7                | 0              | 2.609974                | 1.048053  | -0.000143 |
| 7                | 6                | 0              | 1.758330                | 0.000146  | -0.000180 |
| 8                | 6                | 0              | 3.940242                | 0.672668  | 0.000050  |

|    |   |   |          |           |           |
|----|---|---|----------|-----------|-----------|
| 9  | 6 | 0 | 3.939982 | -0.673221 | -0.000160 |
| 10 | 1 | 0 | 2.285033 | 1.996728  | -0.000170 |
| 11 | 1 | 0 | 2.284252 | -1.996628 | 0.000050  |
| 12 | 1 | 0 | 4.752397 | 1.375285  | 0.000161  |
| 13 | 1 | 0 | 4.751863 | -1.376155 | -0.000200 |

**C<sub>3</sub>N<sub>2</sub>H<sub>4</sub> + HCCBr**

| Center<br>Number | Atomic<br>Number | Atomic<br>Type | Coordinates (Angstroms) |           |           |
|------------------|------------------|----------------|-------------------------|-----------|-----------|
|                  |                  |                | X                       | Y         | Z         |
| -----            |                  |                |                         |           |           |
| 1                | 6                | 0              | -3.241090               | 0.014904  | 0.000007  |
| 2                | 6                | 0              | -4.438690               | 0.037393  | 0.000013  |
| 3                | 1                | 0              | -5.500104               | 0.057171  | 0.000017  |
| 4                | 35               | 0              | -1.432134               | -0.018477 | -0.000003 |
| 5                | 7                | 0              | 2.457515                | -1.051287 | -0.000007 |
| 6                | 7                | 0              | 2.389274                | 1.040366  | -0.000008 |
| 7                | 6                | 0              | 1.565338                | -0.033462 | -0.000022 |
| 8                | 6                | 0              | 3.732191                | 0.710451  | 0.000015  |
| 9                | 6                | 0              | 3.776097                | -0.634460 | 0.000016  |
| 10               | 1                | 0              | 2.035774                | 1.978283  | -0.000016 |
| 11               | 1                | 0              | 2.166141                | -2.010264 | -0.000013 |
| 12               | 1                | 0              | 4.521259                | 1.439137  | 0.000028  |
| 13               | 1                | 0              | 4.611006                | -1.310124 | 0.000030  |

**C<sub>3</sub>N<sub>2</sub>H<sub>4</sub> + HCCCl**

| Center<br>Number | Atomic<br>Number | Atomic<br>Type | Coordinates (Angstroms) |          |          |
|------------------|------------------|----------------|-------------------------|----------|----------|
|                  |                  |                | X                       | Y        | Z        |
| -----            |                  |                |                         |          |          |
| 1                | 6                | 0              | -3.585218               | 0.003363 | 0.004263 |
| 2                | 6                | 0              | -4.781223               | 0.017652 | 0.012313 |

|    |    |   |           |           |           |
|----|----|---|-----------|-----------|-----------|
| 3  | 1  | 0 | -5.842174 | 0.030379  | 0.018983  |
| 4  | 17 | 0 | -1.941087 | -0.015995 | -0.006259 |
| 5  | 7  | 0 | 2.052630  | 1.041272  | -0.005840 |
| 6  | 7  | 0 | 2.091033  | -1.049685 | -0.005142 |
| 7  | 6  | 0 | 1.209894  | -0.019991 | -0.016689 |
| 8  | 6  | 0 | 3.415849  | -0.652306 | 0.011882  |
| 9  | 6  | 0 | 3.391086  | 0.692962  | 0.011446  |
| 10 | 1  | 0 | 1.787047  | -2.004525 | -0.009042 |
| 11 | 1  | 0 | 1.713715  | 1.984300  | -0.010336 |
| 12 | 1  | 0 | 4.241266  | -1.339575 | 0.022606  |
| 13 | 1  | 0 | 4.190653  | 1.410150  | 0.021767  |

**C<sub>3</sub>N<sub>2</sub>H<sub>4</sub> + HCCF**

| Center | Atomic | Atomic | Coordinates (Angstroms) |           |           |
|--------|--------|--------|-------------------------|-----------|-----------|
| Number | Number | Type   | X                       | Y         | Z         |
| -----  |        |        |                         |           |           |
| 1      | 6      | 0      | -2.691653               | 0.077215  | -0.000000 |
| 2      | 6      | 0      | -2.688965               | 1.268653  | 0.000081  |
| 3      | 1      | 0      | -2.721110               | 2.328669  | 0.000159  |
| 4      | 9      | 0      | -2.730858               | -1.185431 | -0.000092 |
| 5      | 7      | 0      | 0.684416                | 0.565318  | -0.000001 |
| 6      | 7      | 0      | 2.004170                | -1.056949 | 0.000063  |
| 7      | 6      | 0      | 0.673597                | -0.789400 | 0.000086  |
| 8      | 6      | 0      | 2.802295                | 0.072961  | -0.000034 |
| 9      | 6      | 0      | 1.951897                | 1.116374  | -0.000075 |
| 10     | 1      | 0      | 2.354047                | -1.995672 | 0.000114  |
| 11     | 1      | 0      | -0.174373               | 1.086923  | -0.000011 |
| 12     | 1      | 0      | 3.876104                | 0.041504  | -0.000065 |
| 13     | 1      | 0      | 2.139922                | 2.174052  | -0.000148 |

**C<sub>3</sub>N<sub>2</sub>H<sub>4</sub> + ICN**

| Center<br>Number | Atomic<br>Number | Atomic<br>Type | Coordinates (Angstroms) |           |           |
|------------------|------------------|----------------|-------------------------|-----------|-----------|
|                  |                  |                | X                       | Y         | Z         |
| 1                | 6                | 0              | -3.126009               | 0.001219  | 0.000160  |
| 2                | 7                | 0              | -4.277675               | 0.002696  | 0.000168  |
| 3                | 53               | 0              | -1.032278               | -0.000885 | -0.000083 |
| 4                | 7                | 0              | 2.470592                | -1.050029 | 0.000116  |
| 5                | 7                | 0              | 2.467837                | 1.050092  | 0.000143  |
| 6                | 6                | 0              | 1.625995                | -0.001084 | 0.000134  |
| 7                | 6                | 0              | 3.797470                | 0.674859  | -0.000067 |
| 8                | 6                | 0              | 3.799247                | -0.671225 | -0.000023 |
| 9                | 1                | 0              | 2.140160                | 1.998427  | 0.000228  |
| 10               | 1                | 0              | 2.145483                | -1.999242 | 0.000180  |
| 11               | 1                | 0              | 4.607988                | 1.379195  | -0.000166 |
| 12               | 1                | 0              | 4.611622                | -1.373413 | -0.000076 |

**C<sub>3</sub>N<sub>2</sub>H<sub>4</sub> + BrCN**

| Center<br>Number | Atomic<br>Number | Atomic<br>Type | Coordinates (Angstroms) |           |           |
|------------------|------------------|----------------|-------------------------|-----------|-----------|
|                  |                  |                | X                       | Y         | Z         |
| 1                | 6                | 0              | 3.194742                | 0.000204  | 0.000004  |
| 2                | 7                | 0              | 4.345030                | 0.000491  | 0.000032  |
| 3                | 35               | 0              | 1.372343                | -0.000230 | -0.000008 |
| 4                | 7                | 0              | -2.309607               | -1.047409 | -0.000003 |
| 5                | 7                | 0              | -2.308768               | 1.047271  | -0.000012 |
| 6                | 6                | 0              | -1.454871               | -0.000412 | -0.000024 |
| 7                | 6                | 0              | -3.639691               | 0.673257  | 0.000023  |
| 8                | 6                | 0              | -3.640234               | -0.672321 | 0.000017  |
| 9                | 1                | 0              | -1.986436               | 1.996606  | -0.000009 |

|    |   |   |           |           |           |
|----|---|---|-----------|-----------|-----------|
| 10 | 1 | 0 | -1.988042 | -1.997003 | -0.000038 |
| 11 | 1 | 0 | -4.451342 | 1.376528  | 0.000034  |
| 12 | 1 | 0 | -4.452449 | -1.374939 | 0.000046  |

**C<sub>3</sub>N<sub>2</sub>H<sub>4</sub> + ClCN**

| Center<br>Number | Atomic<br>Number | Atomic<br>Type | Coordinates (Angstroms) |           |           |
|------------------|------------------|----------------|-------------------------|-----------|-----------|
|                  |                  |                | X                       | Y         | Z         |
| -----            |                  |                |                         |           |           |
| 1                | 6                | 0              | 3.516073                | -0.005004 | -0.003534 |
| 2                | 7                | 0              | 4.665784                | -0.021980 | -0.008355 |
| 3                | 17               | 0              | 1.873865                | 0.018551  | 0.003908  |
| 4                | 7                | 0              | -2.002931               | 1.052283  | 0.003538  |
| 5                | 7                | 0              | -1.949999               | -1.039225 | 0.004117  |
| 6                | 6                | 0              | -1.116867               | 0.028313  | 0.011317  |
| 7                | 6                | 0              | -3.290440               | -0.699703 | -0.007514 |
| 8                | 6                | 0              | -3.324510               | 0.645295  | -0.007897 |
| 9                | 1                | 0              | -1.605744               | -1.980480 | 0.007415  |
| 10               | 1                | 0              | -1.706636               | 2.009701  | 0.006267  |
| 11               | 1                | 0              | -4.084594               | -1.422802 | -0.014382 |
| 12               | 1                | 0              | -4.154238               | 1.327267  | -0.015068 |

**C<sub>3</sub>N<sub>2</sub>H<sub>4</sub> + FCN**

| Center<br>Number | Atomic<br>Number | Atomic<br>Type | Coordinates (Angstroms) |           |           |
|------------------|------------------|----------------|-------------------------|-----------|-----------|
|                  |                  |                | X                       | Y         | Z         |
| -----            |                  |                |                         |           |           |
| 1                | 6                | 0              | 2.393583                | 0.168309  | -0.000038 |
| 2                | 7                | 0              | 2.253470                | 1.308905  | -0.000015 |
| 3                | 9                | 0              | 2.689436                | -1.050368 | 0.000014  |
| 4                | 7                | 0              | -0.715282               | 0.770633  | 0.000015  |
| 5                | 7                | 0              | -1.572518               | -1.139939 | 0.000031  |

|    |   |   |           |           |           |
|----|---|---|-----------|-----------|-----------|
| 6  | 6 | 0 | -0.360517 | -0.533286 | 0.000015  |
| 7  | 6 | 0 | -2.634036 | -0.253536 | -0.000077 |
| 8  | 6 | 0 | -2.080033 | 0.974037  | 0.000059  |
| 9  | 1 | 0 | -1.668194 | -2.137203 | -0.000011 |
| 10 | 1 | 0 | -0.014168 | 1.493549  | 0.000035  |
| 11 | 1 | 0 | -3.663200 | -0.561317 | -0.000081 |
| 12 | 1 | 0 | -2.533037 | 1.947951  | -0.000036 |

$\omega$ B97XD/aug-cc-pVDZ results ( $\omega$ B97XD/aug-cc-pVDZ-PP for iodine)

**C<sub>3</sub>N<sub>2</sub>H<sub>4</sub> + I<sub>2</sub>**

| Center<br>Number | Atomic<br>Number | Atomic<br>Type | Coordinates (Angstroms) |           |           |
|------------------|------------------|----------------|-------------------------|-----------|-----------|
|                  |                  |                | X                       | Y         | Z         |
| -----            |                  |                |                         |           |           |
| 1                | 53               | 0              | -0.192768               | 0.000768  | -0.000077 |
| 2                | 7                | 0              | -3.336658               | 1.061066  | 0.000226  |
| 3                | 7                | 0              | -3.334289               | -1.061205 | 0.000189  |
| 4                | 6                | 0              | -2.507783               | 0.000868  | 0.000155  |
| 5                | 6                | 0              | -4.666077               | -0.679551 | -0.000069 |
| 6                | 6                | 0              | -4.667603               | 0.676403  | -0.000149 |
| 7                | 1                | 0              | -2.991866               | -2.011146 | 0.000233  |
| 8                | 1                | 0              | -2.996477               | 2.011743  | 0.000388  |
| 9                | 1                | 0              | -5.482579               | -1.389464 | -0.000171 |
| 10               | 1                | 0              | -5.485635               | 1.384423  | -0.000360 |
| 11               | 53               | 0              | 2.734315                | -0.000407 | 0.000028  |

**C<sub>3</sub>N<sub>2</sub>H<sub>4</sub> + Br<sub>2</sub>**

| Center<br>Number | Atomic<br>Number | Atomic<br>Type | Coordinates (Angstroms) |          |          |
|------------------|------------------|----------------|-------------------------|----------|----------|
|                  |                  |                | X                       | Y        | Z        |
| -----            |                  |                |                         |          |          |
| 1                | 35               | 0              | -0.193968               | 0.000225 | 0.000308 |



|    |    |   |           |           |           |
|----|----|---|-----------|-----------|-----------|
| 2  | 7  | 0 | 2.589886  | -1.066425 | 0.000111  |
| 3  | 7  | 0 | 2.590372  | 1.066395  | 0.000087  |
| 4  | 6  | 0 | 1.775918  | 0.000170  | 0.000437  |
| 5  | 6  | 0 | 3.920548  | 0.677678  | -0.000442 |
| 6  | 6  | 0 | 3.920237  | -0.678312 | -0.000511 |
| 7  | 1  | 0 | 2.241811  | 2.014821  | 0.000254  |
| 8  | 1  | 0 | 2.240873  | -2.014688 | 0.000385  |
| 9  | 1  | 0 | 4.737898  | 1.386340  | -0.000812 |
| 10 | 1  | 0 | 4.737230  | -1.387303 | -0.000923 |
| 11 | 35 | 0 | -2.889456 | -0.000116 | -0.000228 |

**C<sub>3</sub>N<sub>2</sub>H<sub>4</sub> + Cl<sub>2</sub>**

| Center<br>Number | Atomic<br>Number | Atomic<br>Type | Coordinates (Angstroms) |           |           |
|------------------|------------------|----------------|-------------------------|-----------|-----------|
|                  |                  |                | X                       | Y         | Z         |
| -----            |                  |                |                         |           |           |
| 1                | 17               | 0              | -0.882560               | -0.001032 | -0.000963 |
| 2                | 7                | 0              | 1.655386                | -1.071102 | 0.000073  |
| 3                | 7                | 0              | 1.654531                | 1.071123  | 0.000112  |
| 4                | 6                | 0              | 0.849730                | -0.000289 | 0.000177  |
| 5                | 6                | 0              | 2.984147                | 0.678386  | 0.000215  |
| 6                | 6                | 0              | 2.984653                | -0.677197 | 0.000258  |
| 7                | 1                | 0              | 1.300049                | 2.018416  | 0.000275  |
| 8                | 1                | 0              | 1.301905                | -2.018389 | 0.000267  |
| 9                | 1                | 0              | 3.801425                | 1.387831  | 0.000657  |
| 10               | 1                | 0              | 3.801760                | -1.385238 | 0.000769  |
| 11               | 17               | 0              | -3.487189               | 0.000553  | 0.000541  |

**C<sub>3</sub>N<sub>2</sub>H<sub>4</sub> + F<sub>2</sub>**

| Center<br>Number | Atomic<br>Number | Atomic<br>Type | Coordinates (Angstroms) |   |   |
|------------------|------------------|----------------|-------------------------|---|---|
|                  |                  |                | X                       | Y | Z |

|    |   |   |           |           |           |
|----|---|---|-----------|-----------|-----------|
| 1  | 9 | 0 | -1.571165 | 0.000797  | -0.956602 |
| 2  | 7 | 0 | 0.301626  | -1.118479 | -0.168611 |
| 3  | 7 | 0 | 0.301683  | 1.118514  | -0.167075 |
| 4  | 6 | 0 | -0.550362 | 0.000059  | -0.044442 |
| 5  | 6 | 0 | 1.629531  | 0.669560  | 0.007748  |
| 6  | 6 | 0 | 1.629605  | -0.669488 | 0.007217  |
| 7  | 1 | 0 | -0.014464 | 1.966263  | 0.282287  |
| 8  | 1 | 0 | -0.014210 | -1.965769 | 0.281883  |
| 9  | 1 | 0 | 2.460416  | 1.363346  | 0.012327  |
| 10 | 1 | 0 | 2.460533  | -1.363253 | 0.010756  |
| 11 | 9 | 0 | -1.247511 | -0.000978 | 1.172091  |

### $C_3N_2H_4 + HCCI$

| Center Number | Atomic Number | Atomic Type | Coordinates (Angstroms) |           |           |
|---------------|---------------|-------------|-------------------------|-----------|-----------|
|               |               |             | X                       | Y         | Z         |
| 1             | 6             | 0           | -3.147456               | 0.000147  | 0.000066  |
| 2             | 6             | 0           | -4.361514               | 0.000280  | -0.000032 |
| 3             | 1             | 0           | -5.432037               | 0.000526  | -0.000085 |
| 4             | 53            | 0           | -1.089941               | -0.000104 | 0.000147  |
| 5             | 7             | 0           | 2.603528                | -1.052760 | 0.000033  |
| 6             | 7             | 0           | 2.603317                | 1.052814  | -0.000226 |
| 7             | 6             | 0           | 1.746876                | -0.000061 | 0.000034  |
| 8             | 6             | 0           | 3.938301                | 0.677653  | -0.000388 |
| 9             | 6             | 0           | 3.938438                | -0.677331 | -0.000529 |
| 10            | 1             | 0           | 2.274738                | 2.005615  | -0.000215 |
| 11            | 1             | 0           | 2.275140                | -2.005628 | 0.000264  |
| 12            | 1             | 0           | 4.756481                | 1.386131  | -0.000543 |
| 13            | 1             | 0           | 4.756759                | -1.385644 | -0.000760 |

**C<sub>3</sub>N<sub>2</sub>H<sub>4</sub> + HCCBr**

| Center<br>Number | Atomic<br>Number | Atomic<br>Type | Coordinates (Angstroms) |           |           |
|------------------|------------------|----------------|-------------------------|-----------|-----------|
|                  |                  |                | X                       | Y         | Z         |
| 1                | 6                | 0              | -3.238836               | -0.000291 | 0.000012  |
| 2                | 6                | 0              | -4.449062               | -0.000672 | -0.000409 |
| 3                | 1                | 0              | -5.518475               | -0.001106 | -0.000734 |
| 4                | 35               | 0              | -1.421591               | 0.000337  | 0.000549  |
| 5                | 7                | 0              | 2.413441                | -1.051094 | -0.000235 |
| 6                | 7                | 0              | 2.414024                | 1.051044  | -0.000307 |
| 7                | 6                | 0              | 1.549781                | 0.000215  | 0.000089  |
| 8                | 6                | 0              | 3.749983                | 0.676957  | -0.000922 |
| 9                | 6                | 0              | 3.749607                | -0.677747 | -0.000779 |
| 10               | 1                | 0              | 2.088573                | 2.004429  | -0.000191 |
| 11               | 1                | 0              | 2.087461                | -2.004298 | -0.000048 |
| 12               | 1                | 0              | 4.568899                | 1.384774  | -0.001336 |
| 13               | 1                | 0              | 4.568128                | -1.386020 | -0.001065 |

**C<sub>3</sub>N<sub>2</sub>H<sub>4</sub> + HCCCl**

| Center<br>Number | Atomic<br>Number | Atomic<br>Type | Coordinates (Angstroms) |           |           |
|------------------|------------------|----------------|-------------------------|-----------|-----------|
|                  |                  |                | X                       | Y         | Z         |
| 1                | 6                | 0              | 3.585144                | 0.000000  | 0.000130  |
| 2                | 6                | 0              | 4.793486                | 0.000389  | 0.000229  |
| 3                | 1                | 0              | 5.862360                | 0.000555  | 0.000362  |
| 4                | 17               | 0              | 1.929115                | -0.000288 | -0.000151 |
| 5                | 7                | 0              | -2.067545               | -1.050133 | -0.000068 |
| 6                | 7                | 0              | -2.067688               | 1.050304  | -0.000047 |
| 7                | 6                | 0              | -1.199642               | 0.000150  | -0.000337 |
| 8                | 6                | 0              | -3.404350               | 0.677266  | 0.000174  |

|    |   |   |           |           |           |
|----|---|---|-----------|-----------|-----------|
| 9  | 6 | 0 | -3.404257 | -0.677294 | 0.000208  |
| 10 | 1 | 0 | -1.743307 | 2.003820  | -0.000068 |
| 11 | 1 | 0 | -1.743027 | -2.003601 | -0.000098 |
| 12 | 1 | 0 | -4.223422 | 1.385070  | 0.000347  |
| 13 | 1 | 0 | -4.223226 | -1.385218 | 0.000403  |

### **C<sub>3</sub>N<sub>2</sub>H<sub>4</sub> + HCCF**

| Center<br>Number | Atomic<br>Number | Atomic<br>Type | Coordinates (Angstroms) |           |           |
|------------------|------------------|----------------|-------------------------|-----------|-----------|
|                  |                  |                | X                       | Y         | Z         |
| -----            |                  |                |                         |           |           |
| 1                | 6                | 0              | 3.981984                | -0.000012 | -0.000151 |
| 2                | 6                | 0              | 5.184140                | 0.000127  | 0.000004  |
| 3                | 1                | 0              | 6.252714                | 0.000212  | 0.000485  |
| 4                | 9                | 0              | 2.706400                | -0.000150 | -0.000506 |
| 5                | 7                | 0              | -1.975507               | -1.049517 | -0.000039 |
| 6                | 7                | 0              | -1.975721               | 1.049623  | -0.000040 |
| 7                | 6                | 0              | -1.104287               | 0.000142  | -0.000478 |
| 8                | 6                | 0              | -3.312996               | 0.677156  | 0.000584  |
| 9                | 6                | 0              | -3.312858               | -0.677322 | 0.000553  |
| 10               | 1                | 0              | -1.651634               | 2.003040  | -0.000178 |
| 11               | 1                | 0              | -1.651226               | -2.002867 | -0.000180 |
| 12               | 1                | 0              | -4.132518               | 1.384665  | 0.000984  |
| 13               | 1                | 0              | -4.132235               | -1.384998 | 0.000927  |

### **C<sub>3</sub>N<sub>2</sub>H<sub>4</sub> + HCCF second local minimum**

| Center<br>Number | Atomic<br>Number | Atomic<br>Type | Coordinates (Angstroms) |          |           |
|------------------|------------------|----------------|-------------------------|----------|-----------|
|                  |                  |                | X                       | Y        | Z         |
| -----            |                  |                |                         |          |           |
| 1                | 6                | 0              | -2.671916               | 0.076306 | 0.000064  |
| 2                | 6                | 0              | -2.669860               | 1.279906 | -0.000018 |

|    |   |   |           |           |           |
|----|---|---|-----------|-----------|-----------|
| 3  | 1 | 0 | -2.708834 | 2.348094  | -0.000085 |
| 4  | 9 | 0 | -2.718009 | -1.193422 | 0.000112  |
| 5  | 7 | 0 | 0.687999  | 0.596757  | -0.000023 |
| 6  | 7 | 0 | 1.964130  | -1.071345 | -0.000043 |
| 7  | 6 | 0 | 0.634795  | -0.763881 | -0.000025 |
| 8  | 6 | 0 | 2.799477  | 0.037063  | -0.000045 |
| 9  | 6 | 0 | 1.974913  | 1.112499  | -0.000029 |
| 10 | 1 | 0 | 2.286065  | -2.025367 | -0.000054 |
| 11 | 1 | 0 | -0.161134 | 1.143094  | -0.000013 |
| 12 | 1 | 0 | 3.880358  | -0.026592 | -0.000057 |
| 13 | 1 | 0 | 2.196270  | 2.172322  | -0.000025 |

**C<sub>3</sub>N<sub>2</sub>H<sub>4</sub> + ICN**

| Center | Atomic | Atomic | Coordinates (Angstroms) |           |           |
|--------|--------|--------|-------------------------|-----------|-----------|
| Number | Number | Type   | X                       | Y         | Z         |
| -----  |        |        |                         |           |           |
| 1      | 6      | 0      | -3.136117               | 0.000039  | 0.000184  |
| 2      | 7      | 0      | -4.298976               | 0.000010  | 0.000143  |
| 3      | 53     | 0      | -1.028021               | -0.000010 | 0.000086  |
| 4      | 7      | 0      | 2.467665                | -1.054936 | -0.000163 |
| 5      | 7      | 0      | 2.467611                | 1.054929  | -0.000057 |
| 6      | 6      | 0      | 1.619666                | -0.000027 | 0.000019  |
| 7      | 6      | 0      | 3.801354                | 0.677607  | -0.000293 |
| 8      | 6      | 0      | 3.801390                | -0.677549 | -0.000405 |
| 9      | 1      | 0      | 2.137561                | 2.007802  | 0.000059  |
| 10     | 1      | 0      | 2.137661                | -2.007825 | -0.000132 |
| 11     | 1      | 0      | 4.618992                | 1.386472  | -0.000386 |
| 12     | 1      | 0      | 4.619064                | -1.386374 | -0.000595 |

**C<sub>3</sub>N<sub>2</sub>H<sub>4</sub> + BrCN**

| Center<br>Number | Atomic<br>Number | Atomic<br>Type | Coordinates (Angstroms) |           |           |
|------------------|------------------|----------------|-------------------------|-----------|-----------|
|                  |                  |                | X                       | Y         | Z         |
| 1                | 6                | 0              | 3.195569                | -0.000022 | -0.000005 |
| 2                | 7                | 0              | 4.356880                | -0.000053 | 0.000027  |
| 3                | 35               | 0              | 1.365349                | 0.000025  | -0.000008 |
| 4                | 7                | 0              | -2.303715               | -1.052006 | 0.000002  |
| 5                | 7                | 0              | -2.303814               | 1.052023  | 0.000002  |
| 6                | 6                | 0              | -1.444083               | 0.000050  | -0.000000 |
| 7                | 6                | 0              | -3.639172               | 0.677269  | 0.000005  |
| 8                | 6                | 0              | -3.639108               | -0.677378 | 0.000005  |
| 9                | 1                | 0              | -1.978691               | 2.005790  | 0.000002  |
| 10               | 1                | 0              | -1.978501               | -2.005742 | 0.000002  |
| 11               | 1                | 0              | -4.457426               | 1.385691  | 0.000007  |
| 12               | 1                | 0              | -4.457295               | -1.385877 | 0.000007  |

**C<sub>3</sub>N<sub>2</sub>H<sub>4</sub> + ClCN**

| Center<br>Number | Atomic<br>Number | Atomic<br>Type | Coordinates (Angstroms) |           |           |
|------------------|------------------|----------------|-------------------------|-----------|-----------|
|                  |                  |                | X                       | Y         | Z         |
| 1                | 6                | 0              | 3.521617                | -0.000064 | -0.000013 |
| 2                | 7                | 0              | 4.682310                | -0.000177 | 0.000058  |
| 3                | 17               | 0              | 1.867591                | 0.000164  | -0.000021 |
| 4                | 7                | 0              | -1.976121               | -1.050614 | -0.000006 |
| 5                | 7                | 0              | -1.976718               | 1.050779  | -0.000006 |
| 6                | 6                | 0              | -1.110752               | 0.000332  | -0.000048 |
| 7                | 6                | 0              | -3.312824               | 0.676923  | 0.000025  |
| 8                | 6                | 0              | -3.312438               | -0.677523 | 0.000028  |
| 9                | 1                | 0              | -1.653821               | 2.004954  | -0.000016 |
| 10               | 1                | 0              | -1.652677               | -2.004604 | -0.000023 |

|    |   |   |           |           |          |
|----|---|---|-----------|-----------|----------|
| 11 | 1 | 0 | -4.131622 | 1.384901  | 0.000057 |
| 12 | 1 | 0 | -4.130831 | -1.385970 | 0.000061 |

**C<sub>3</sub>N<sub>2</sub>H<sub>4</sub> + FCN**

| Center | Atomic | Atomic | Coordinates (Angstroms) |   |   |
|--------|--------|--------|-------------------------|---|---|
| Number | Number | Type   | X                       | Y | Z |

|       |   |   |           |           |           |
|-------|---|---|-----------|-----------|-----------|
| ----- |   |   |           |           |           |
| 1     | 6 | 0 | 3.707242  | 0.000031  | -0.000132 |
| 2     | 7 | 0 | 4.865493  | 0.000040  | -0.000512 |
| 3     | 9 | 0 | 2.444432  | -0.000064 | 0.000273  |
| 4     | 7 | 0 | -1.772463 | -1.049650 | -0.000131 |
| 5     | 7 | 0 | -1.772738 | 1.049762  | -0.000076 |
| 6     | 6 | 0 | -0.901978 | 0.000171  | -0.000292 |
| 7     | 6 | 0 | -3.109769 | 0.677050  | 0.000335  |
| 8     | 6 | 0 | -3.109591 | -0.677289 | 0.000398  |
| 9     | 1 | 0 | -1.450041 | 2.003689  | -0.000206 |
| 10    | 1 | 0 | -1.449516 | -2.003492 | -0.000300 |
| 11    | 1 | 0 | -3.929082 | 1.384698  | 0.000563  |
| 12    | 1 | 0 | -3.928718 | -1.385153 | 0.000668  |
